# Supplementary material for: Optimization of florfenicol dose against Piscirickettsia salmonis in Salmo salar through PK/PD studies
Source: PubMed Central journal article supplement (PMC6513110; doi:10.1371/journal.pone.0215174), 2019-05-13
Supplement: pone.0215174.s001.pdf [file pone.0215174.s001.pdf]

a)

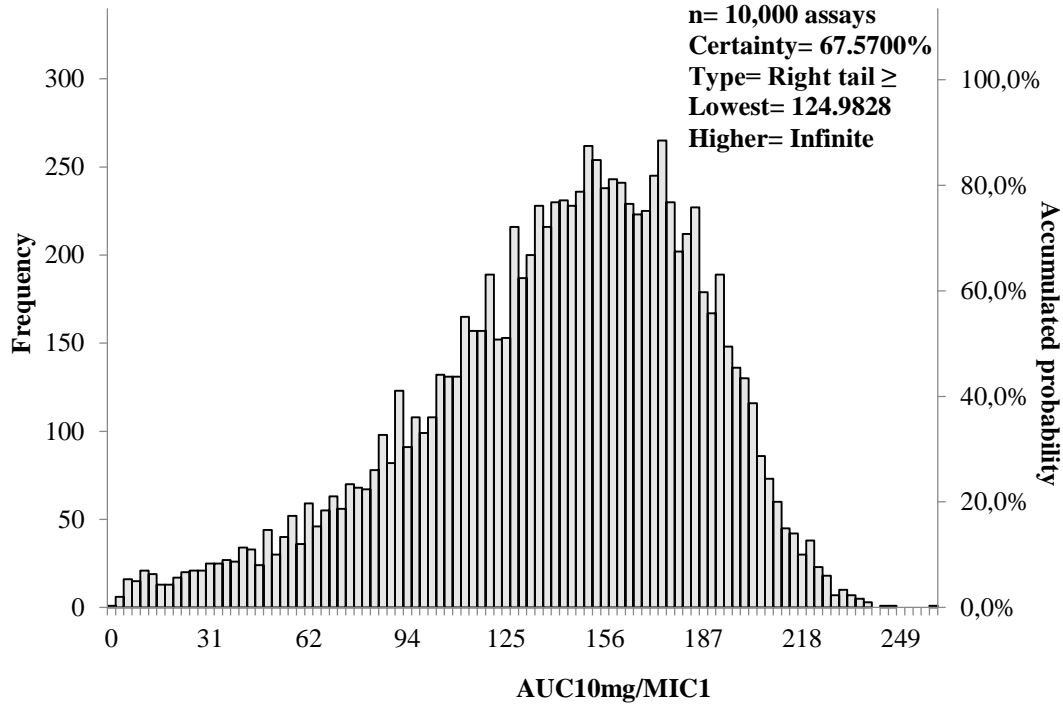

b)

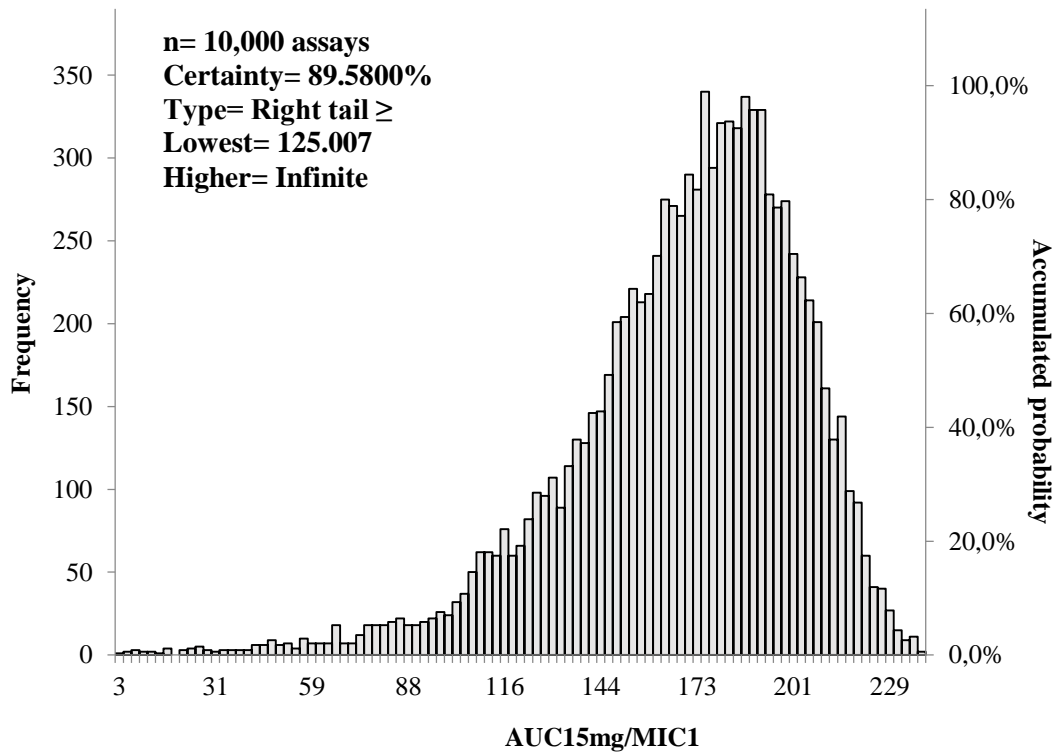

c)

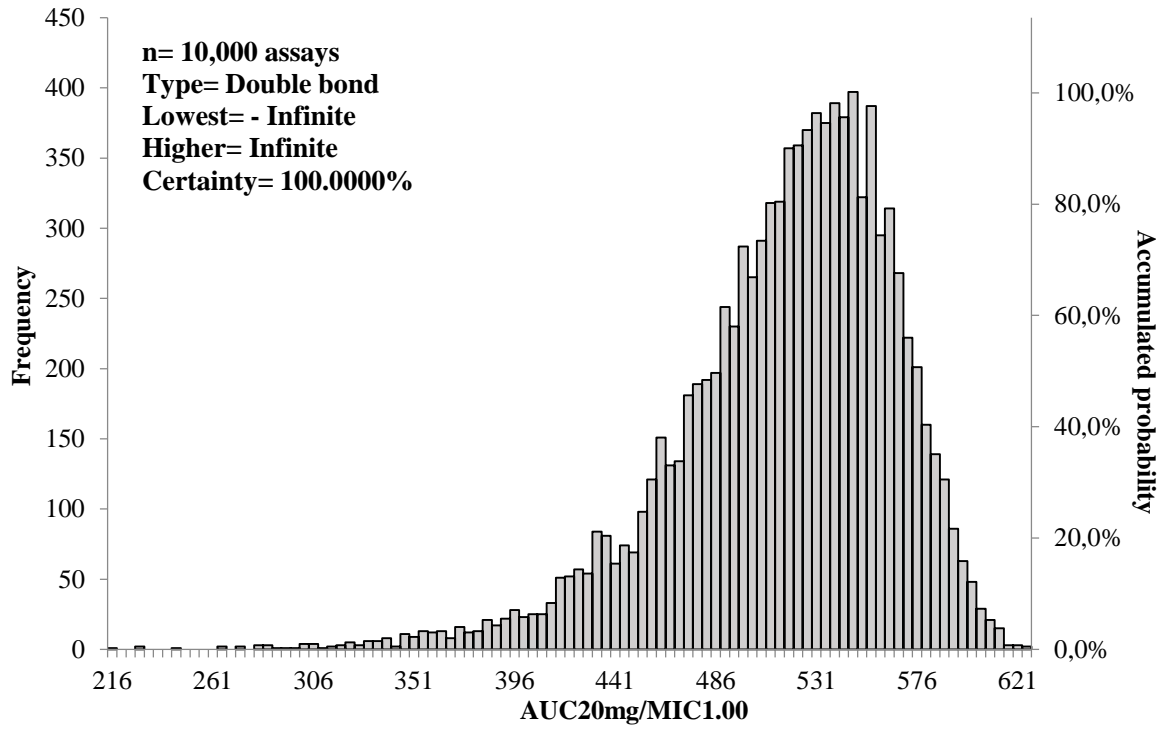

**S1 Fig. Integration of pharmacokinetic and pharmacodynamic variables (PK/PD) using the Montecarlo simulation. MIC=1  $\mu\text{g}/\text{mL}$ . a) Dose=10 mg/Kg; b) Dose=15 mg/Kg; b) Dose=20 mg/Kg.**
