# Supplementary material for: Optimization of florfenicol dose against Piscirickettsia salmonis in Salmo salar through PK/PD studies
Source: PubMed Central journal article supplement (PMC6513110; doi:10.1371/journal.pone.0215174), 2019-05-13
Supplement: pone.0215174.s002.pdf [file pone.0215174.s002.pdf]

**S1 Table. Minimum Inhibitory Concentration values of 87 strains of *Piscirickettsia salmonis* versus florfenicol.**

| Sample ID | MIC   |
|-----------|-------|
| 22        | 0.125 |
| 222       | 0.125 |
| 888       | 0.125 |
| 891       | 0.125 |
| 898       | 0.125 |
| 908       | 0.125 |
| 1224      | 0.125 |
| 1278      | 0.125 |
| 1279      | 0.25  |
| 1280      | 0.125 |
| 1281      | 0.125 |
| 1282      | 0.125 |
| 1287      | 0.06  |
| 1303      | 0.125 |
| 1315      | 0.125 |
| 1316      | 0.125 |
| 1317      | 0.125 |
| 1318      | 0.125 |
| 1319      | 0.125 |
| 1320      | 0.125 |
| 1321      | 0.125 |
| 1363      | 0.125 |
| 2192      | 0.125 |
| 2493      | 0.125 |
| 2494      | 0.125 |
| 2855      | 0.125 |
| 3045      | 0.125 |
| 5289      | 0.125 |
| 5449      | 0.125 |
| 5463      | 0.125 |
| 5549      | 0.125 |
| 6253      | 0.125 |
| 9386      | 0.125 |
| 9484      | 0.125 |

| Sample ID | MIC   |
|-----------|-------|
| 9734      | 0.125 |
| 10002     | 0.125 |
| 10197     | 0.125 |
| 10255-1   | 0.125 |
| 10255-2   | 0.125 |
| 10514     | 0.125 |
| 10534     | 0.125 |
| 10693     | 0.125 |
| 11152     | 0.125 |
| 11210     | 0.125 |
| 11216     | 0.125 |
| 11252     | 0.125 |
| 11259     | 0.125 |
| 11297     | 0.125 |
| 11330     | 0.125 |
| 11337     | 0.06  |
| 11531     | 0.125 |
| 11570     | 0.125 |
| 11608     | 0.125 |
| 11618     | 0.125 |
| 11742     | 0.125 |
| 11744     | 0.125 |
| 11755     | 0.125 |
| 11808     | 0.125 |
| 11942     | 0.125 |
| 11944     | 0.125 |
| 12093     | 0.125 |
| 12157     | 0.125 |
| 12181     | 0.06  |
| 12182     | 0.25  |
| 12282     | 0.06  |
| 12564     | 0.125 |
| 12565     | 0.125 |
| 12655     | 0.25  |

| <b>Sample ID</b> | <b>MIC</b> |
|------------------|------------|
| 13287            | 0.125      |
| 14650            | 0.06       |
| 15677            | 0.125      |
| 17083            | 0.06       |
| 17139            | 0.125      |
| 17490            | 0.125      |
| 18059            | 0.125      |
| 18157            | 0.06       |
| 18380            | 0.125      |
| 18460            | 0.125      |
| 18446            | 0.125      |
| 18545            | 0.125      |
| 18627            | 0.125      |
| 18729            | 0.125      |
| 18756            | 0.25       |
| 18757            | 0.25       |
| 18874            | 0.25       |
| 18766            | 0.25       |
| 11337            | 0.06       |
| 11531            | 0.125      |
| 11570            | 0.125      |
| 11608            | 0.125      |
| 11618            | 0.125      |
| 11742            | 0.125      |
| 11744            | 0.125      |
| 11755            | 0.125      |
| 11808            | 0.125      |
| 11942            | 0.125      |
| 11944            | 0.125      |
| 12093            | 0.125      |
| 12157            | 0.125      |
| 12181            | 0.06       |

| <b>Sample ID</b> | <b>MIC</b> |
|------------------|------------|
| 12564            | 0.125      |
| 12565            | 0.125      |
| 12655            | 0.25       |
| 13287            | 0.125      |
| 14650            | 0.06       |
| 15677            | 0.125      |
| 17083            | 0.06       |
| 17139            | 0.125      |
| 17490            | 0.125      |
| 18059            | 0.125      |
| 18157            | 0.06       |
| 18380            | 0.125      |
| 18460            | 0.125      |
| 18446            | 0.125      |
| 18545            | 0.125      |
| 18627            | 0.125      |
| 18729            | 0.125      |
| 18756            | 0.25       |
| 18757            | 0.25       |
| 18874            | 0.25       |
| 18766            | 0.25       |
| 11210            | 0.125      |
| 11216            | 0.125      |
| 11252            | 0.125      |
| 11259            | 0.125      |
| 11297            | 0.125      |
| 11330            | 0.125      |
| 12182            | 0.25       |
| 12282            | 0.06       |
