# Supplementary material for: Optimization of florfenicol dose against Piscirickettsia salmonis in Salmo salar through PK/PD studies
Source: PubMed Central journal article supplement (PMC6513110; doi:10.1371/journal.pone.0215174), 2019-05-13
Supplement: pone.0215174.s003.pdf [file pone.0215174.s003.pdf]

**S2 Table. Average plasma concentrations ( $\mu\text{g/mL}$ ) by sampling time (hours) and dose: 10, 15 and 20 mg/Kg.**

| Dose (mg/Kg) | Fish | Sampling time (h) |        |        |        |        |         |         |         |         |          |
|--------------|------|-------------------|--------|--------|--------|--------|---------|---------|---------|---------|----------|
|              |      | T1 (0)            | T2 (1) | T3 (3) | T4 (6) | T5 (8) | T6 (12) | T7 (16) | T8 (24) | T9 (36) | T10 (48) |
| 10           | 1    | 0.00              | 0.00   | 0.68   | 3.36   | 8.74   | 0.70    | 0.09    | 0.60    | 0.31    | 0.02     |
|              | 2    | 0.00              | 0.00   | 0.00   | 2.93   | 5.47   | 8.61    | 11.92   | 7.24    | 0.39    | 1.01     |
|              | 3    | 0.00              | 0.07   | 0.00   | 4.73   | 5.39   | 0.18    | 7.98    | 9.16    | 0.97    | 0.87     |
|              | 4    | 0.00              | 0.03   | 3.64   | 4.66   | 2.72   | 9.83    | 10.70   | 1.61    | 1.55    | 0.71     |
|              | 5    | 0.00              | 0.00   | 2.10   | 2.80   | 1.40   | 15.5    | 2.1     | 1.5     | 1.6     | 0.8      |
|              | 6    | 0.00              | 0.03   | 1.66   | 4.00   | 5.33   | 5.53    | 7.58    | 1.56    | 0.72    | 1.29     |
|              | 7    | 0.00              | 0.00   | 1.20   | 2.50   | 6.60   | 12.5    | 7.5     | 2.0     | 1.6     | 0.6      |
|              | 8    | 0.00              | 0.10   | 0.00   | 1.10   | 11.2   | 9.8     | 7.5     | 3.5     | 5.3     | 0.9      |
|              | 9    | 0.00              | 0.20   | 2.00   | 0.90   | 5.3    | 10.7    | 7.0     | 3.2     | 0.4     | 0.7      |
|              | 10   | 0.00              | 0.00   | 0.00   | 3.76   | 5.41   | 6.92    | 2.55    | 3.28    | 1.83    | 0.84     |
|              | 11   | 0.00              | 0.10   | 3.37   | 0.55   | 1.91   | 9.83    | 7.49    | 4.15    | 1.72    | 0.78     |
|              | 12   | 0.00              | 0.01   | 2.03   | 3.14   | 5.41   | 17.37   | 10.07   | 2.69    | 3.98    | 0.68     |
| 15           | 1    | 0.00              | 0.00   | 2.51   | 9.41   | 12.43  | 10.61   | 4.79    | 4.35    | 1.64    | 0.25     |
|              | 2    | 0.00              | 0.20   | 5.39   | 12.40  | 11.76  | 9.57    | 6.44    | 3.74    | 1.64    | 0.60     |
|              | 3    | 0.00              | 0.40   | 2.35   | 4.05   | 10.05  | 12.95   | 7.67    | 4.35    | 2.31    | 1.17     |
|              | 4    | 0.00              | 1.35   | 2.38   | 8.04   | 13.11  | 10.28   | 4.48    | 2.63    | 2.46    | 0.15     |
|              | 5    | 0.55              | 3.14   | 4.93   | 5.75   | 12.07  | 10.24   | 7.22    | 18.41   | 1.64    | 1.25     |
|              | 6    | 0.00              | 0.00   | 3.69   | 5.90   | 8.14   | 14.66   | 6.28    | 1.96    | 2.52    | 0.07     |
|              | 7    | 0.00              | 0.32   | 5.77   | 7.68   | 7.71   | 18.78   | 0.94    | 4.00    | 1.53    | 0.60     |
|              | 8    | 0.00              | 0.00   | 3.01   | 3.92   | 11.94  | 2.50    | 2.89    | 7.01    | 0.77    | 0.39     |
|              | 9    | 0.00              | 0.20   | 6.02   | 4.78   | 9.58   | 6.08    | 2.30    | 4.35    | 0.17    | 0.57     |
|              | 10   | 0.00              | 0.00   | 5.95   | 5.53   | 7.78   | 10.26   | 6.41    | 1.97    | 3.31    | 0.60     |
|              | 11   | 0.00              | 0.00   | 7.12   | 5.76   | 3.97   | 13.69   | 3.05    | 3.06    | 0.07    | 0.19     |
|              | 12   | 0.00              | 1.25   | 6.70   | 6.66   | 12.11  | 3.72    | 2.98    | 3.35    | 1.64    | 1.54     |
| 20           | 1    | 0.00              | 0.00   | 0.30   | 8.61   | 8.23   | 26.18   | 20.94   | 19.80   | 11.62   | 0.00     |
|              | 2    | 0.00              | 0.23   | 1.19   | 8.70   | 7.23   | 19.32   | 16.65   | 18.40   | 10.64   | 0.00     |
|              | 3    | 0.00              | 0.00   | 1.99   | 4.52   | 6.99   | 18.31   | 21.56   | 17.49   | 11.29   | 0.00     |
|              | 4    | 0.00              | 0.02   | 1.64   | 10.30  | 8.51   | 14.31   | 12.67   | 13.76   | 8.86    | 0.00     |
|              | 5    | 0.00              | 0.00   | 0.76   | 8.04   | 7.91   | 20.25   | 17.12   | 17.98   | 9.83    | 0.01     |
|              | 6    | 0.00              | 0.43   | 2.86   | 8.70   | 6.01   | 20.49   | 17.60   | 20.05   | 11.87   | 0.00     |
|              | 7    | 0.00              | 0.48   | 4.17   | 10.50  | 6.99   | 16.23   | 18.70   | 17.94   | 10.64   | 0.00     |
|              | 8    | 0.00              | 0.00   | 1.87   | 8.53   | 6.98   | 15.52   | 21.09   | 19.39   | 8.77    | 0.00     |
|              | 9    | 0.00              | 0.00   | 0.53   | 8.70   | 6.99   | 20.49   | 17.13   | 16.71   | 11.29   | 0.00     |
|              | 10   | 0.00              | 0.00   | 1.41   | 8.63   | 4.54   | 15.82   | 16.94   | 17.29   | 11.55   | 0.00     |
|              | 11   | 0.00              | 0.00   | 1.66   | 10.48  | 6.35   | 18.38   | 15.27   | 16.63   | 10.64   | 0.00     |
|              | 12   | 0.00              | 0.92   | 1.29   | 8.70   | 7.18   | 14.38   | 19.37   | 14.91   | 11.47   | 0.06     |
