# Supplementary material for: Optimization of florfenicol dose against Piscirickettsia salmonis in Salmo salar through PK/PD studies
Source: PubMed Central journal article supplement (PMC6513110; doi:10.1371/journal.pone.0215174), 2019-05-13
Supplement: pone.0215174.s004.pdf [file pone.0215174.s004.pdf]

**S3 Table. Pharmacokinetics parameters of florfenicol by the trial dose: 10, 15 and 20 mg/Kg.**

| <b>Dose (mg/Kg)</b> | <b>Fish</b> | <b>AUC</b> | <b>Cmax (µg/mL)</b> | <b>Tmax (h)</b> |
|---------------------|-------------|------------|---------------------|-----------------|
| <b>10</b>           | 1           | 51.00      | 8.73                | 8               |
|                     | 2           | 177.69     | 11.92               | 16              |
|                     | 3           | 100.72     | 9.16                | 24              |
|                     | 4           | 174.93     | 10.69               | 16              |
|                     | 5           | 127.02     | 15.51               | 12              |
|                     | 6           | 129.66     | 7.57                | 16              |
|                     | 7           | 170.63     | 12.52               | 12              |
|                     | 8           | 167.17     | 11.23               | 8               |
|                     | 9           | 146.57     | 10.67               | 12              |
|                     | 10          | 94.84      | 6.92                | 12              |
|                     | 11          | 133.29     | 9.83                | 12              |
|                     | 12          | 218.94     | 17.37               | 12              |
| <b>15</b>           | 1           | 183.72     | 12.43               | 8               |
|                     | 2           | 201.37     | 11.76               | 8               |
|                     | 3           | 195.18     | 12.95               | 12              |
|                     | 4           | 178.27     | 13.10               | 8               |
|                     | 5           | 193.70     | 18.40               | 24              |
|                     | 6           | 194.01     | 14.66               | 12              |
|                     | 7           | 182.89     | 18.78               | 12              |
|                     | 8           | 102.14     | 11.93               | 8               |
|                     | 9           | 116.64     | 9.58                | 8               |
|                     | 10          | 169.46     | 10.25               | 12              |
|                     | 11          | 150.39     | 13.69               | 12              |
|                     | 12          | 125.26     | 12.11               | 8               |
| <b>20</b>           | 1           | 621.44     | 26.17               | 12              |
|                     | 2           | 526.75     | 19.31               | 12              |
|                     | 3           | 536.74     | 21.56               | 16              |
|                     | 4           | 419.73     | 14.30               | 12              |
|                     | 5           | 531.17     | 20.24               | 12              |
|                     | 6           | 558.97     | 20.49               | 12              |
|                     | 7           | 528.33     | 18.70               | 16              |
|                     | 8           | 550.85     | 21.08               | 16              |
|                     | 9           | 515.36     | 20.48               | 12              |
|                     | 10          | 484.11     | 17.29               | 24              |
|                     | 11          | 491.37     | 18.37               | 24              |
|                     | 12          | 477.28     | 19.36               | 16              |
