# Supplementary material for: Optimization of florfenicol dose against Piscirickettsia salmonis in Salmo salar through PK/PD studies
Source: PubMed Central journal article supplement (PMC6513110; doi:10.1371/journal.pone.0215174), 2019-05-13
Supplement: pone.0215174.s005.pdf [file pone.0215174.s005.pdf]

**S4 Table. Specific Feed Rate (%) by date of experiment and group.**

| Date          | SFR                 |                     |                     |                  |                 |                  |
|---------------|---------------------|---------------------|---------------------|------------------|-----------------|------------------|
|               | Days from challenge | Challenge group TK2 | Challenge group TK3 | Control (+) TK 5 | Control (+) TK6 | Control (-) TK 9 |
| <b>14-Aug</b> | 0                   | 0                   | 0                   | 0                | 0               | 0                |
| <b>15-Aug</b> | 1                   | 0.73                | 0.61                | 0.67             | 0.60            | 0.77             |
| <b>16-Aug</b> | 2                   | 0.90                | 0.84                | 0.86             | 0.70            | 0.92             |
| <b>17-Aug</b> | 3                   | 0.84                | 0.97                | 0.77             | 0.91            | 0.96             |
| <b>18-Aug</b> | 4                   | 1.09                | 0.99                | 1.23             | 1.19            | 1.22             |
| <b>19-Aug</b> | 5                   | 1.16                | 1.08                | 1.27             | 1.19            | 1.23             |
| <b>20-Aug</b> | 6                   | 1.19                | 1.06                | 0.97             | 1.15            | 1.21             |
| <b>21-Aug</b> | 7                   | 1.22                | 1.10                | 1.06             | 1.32            | 1.11             |
| <b>22-Aug</b> | 8                   | 1.22                | 1.11                | 1.23             | 1.40            | 1.02             |
| <b>23-Aug</b> | 9                   | 1.22                | 1.17                | 1.18             | 1.36            | 1.12             |
| <b>24-Aug</b> | 10                  | 1.08                | 1.09                | 1.08             | 1.26            | 1.46             |
| <b>25-Aug</b> | 11                  | 1.29                | 1.26                | 1.47             | 1.21            | 1.48             |
| <b>26-Aug</b> | 12                  | 1.18                | 1.08                | 1.34             | 1.21            | 1.46             |
| <b>27-Aug</b> | 13                  | 1.15                | 1.03                | 1.27             | 1.19            | 1.45             |
| <b>28-Aug</b> | 14                  | 1.28                | 1.20                | 0.60             | 1.23            | 1.12             |
| <b>29-Aug</b> | 15                  | 0.99                | 1.03                | 0.38             | 0.79            | 1.35             |
| <b>30-Aug</b> | 16                  | 1.21                | 1.18                | 0.86             | 0.78            | 1.44             |
| <b>31-Aug</b> | 17                  | 1.22                | 1.13                | 0.92             | 0.89            | 1.45             |
| <b>1-Sep</b>  | 18                  | 1.29                | 1.28                | 1.29             | 0.73            | 1.42             |
| <b>2-Sep</b>  | 19                  | 1.27                | 1.21                | 1.04             | 0.94            | 1.42             |
| <b>3-Sep</b>  | 20                  | 1.17                | 1.15                | 1.13             | 1.21            | 1.50             |
| <b>4-Sep</b>  | 21                  | 1.37                | 1.33                | 1.18             | 1.09            | 1.34             |
| <b>5-Sep</b>  | 22                  | 1.39                | 1.36                | 1.13             | 1.09            | 1.24             |
| <b>6-Sep</b>  | 23                  | 1.39                | 1.37                | 1.25             | 1.14            | 1.50             |
| <b>7-Sep</b>  | 24                  | 1.42                | 1.45                | 1.33             | 1.19            | 1.50             |
| <b>8-Sep</b>  | 25                  | 1.45                | 1.49                | 1.29             | 1.19            | 1.50             |
| <b>9-Sep</b>  | 26                  | 1.43                | 1.40                | 1.26             | 1.11            | 1.43             |
| <b>10-Sep</b> | 27                  | 1.44                | 1.40                | 1.16             | 0.99            | 1.41             |
| <b>11-Sep</b> | 28                  | 1.43                | 1.46                | 1.34             | 1.17            | 1.50             |
| <b>12-Sep</b> | 29                  | 1.44                | 1.46                | 1.34             | 1.25            | 1.46             |
| <b>13-Sep</b> | 30                  | 1.46                | 1.45                | 1.29             | 1.12            | 1.50             |
| <b>14-Sep</b> | 31                  | 1.44                | 1.43                | 1.39             | 0.98            | 1.35             |
| <b>15-Sep</b> | 32                  | 1.48                | 1.47                | 1.42             | 1.02            | 1.50             |
| <b>16-Sep</b> | 33                  | 1.46                | 1.46                | 1.40             | 0.86            | 1.38             |
| <b>17-Sep</b> | 34                  |                     |                     | 1.31             | 0.82            | 1.45             |

|               |    |  |  |      |      |      |
|---------------|----|--|--|------|------|------|
| <b>18-Sep</b> | 35 |  |  | 1.47 | 1.47 | 1.50 |
| <b>19-Sep</b> | 36 |  |  | 1.38 | 1.38 | 1.50 |
| <b>20-Sep</b> | 37 |  |  | 1.15 | 1.33 | 1.50 |
| <b>21-Sep</b> | 38 |  |  | 1.10 | 1.29 | 1.47 |
| <b>22-Sep</b> | 39 |  |  | 1.20 | 1.42 | 1.50 |
| <b>23-Sep</b> | 40 |  |  | 1.50 | 1.50 | 1.44 |
| <b>24-Sep</b> | 41 |  |  | 1.42 | 1.39 | 1.41 |
| <b>25-Sep</b> | 42 |  |  | 1.40 | 1.46 | 1.45 |
| <b>26-Sep</b> | 43 |  |  | 1.42 | 1.44 | 1.50 |

Challenge group: Tanks 2 and 3; Control (+) (without medication): Tanks 5 and 6; Control (-) (without challenge): Tank 9. TK: Tank; SFR: Specific Feed Rate.
