# Supplementary material for: Optimization of florfenicol dose against Piscirickettsia salmonis in Salmo salar through PK/PD studies
Source: PubMed Central journal article supplement (PMC6513110; doi:10.1371/journal.pone.0215174), 2019-05-13
Supplement: pone.0215174.s006.pdf [file pone.0215174.s006.pdf]

**S5 Table. Cumulative mortality (%) of challenge group by date of experiment.**

| Date   | Temperature (°C) | Day | Challenge group |                |               |                     |                   |               |
|--------|------------------|-----|-----------------|----------------|---------------|---------------------|-------------------|---------------|
|        |                  |     | Total (N°)      | Mortality /day | Mortality (%) | Withdrawn /analysis | Accumulated Mort. | Mortality (%) |
| 14-Aug | 14.9             | 0   | 60              | 0.00           | 0.00          | 0.00                | 0.00              | 0.00          |
| 15-Aug | 14.7             | 1   | 60              | 0.00           | 0.00          | 0.00                | 0.00              | 0.00          |
| 16-Aug | 15.3             | 2   | 60              | 0.00           | 0.00          | 0.00                | 0.00              | 0.00          |
| 17-Aug | 15.0             | 3   | 56              | 0.00           | 0.00          | 4.00                | 0.00              | 0.00          |
| 18-Aug | 15.5             | 4   | 56              | 0.00           | 0.00          | 0.00                | 0.00              | 0.00          |
| 19-Aug | 14.6             | 5   | 56              | 0.00           | 0.00          | 0.00                | 0.00              | 0.00          |
| 20-Aug | 15.3             | 6   | 56              | 0.00           | 0.00          | 0.00                | 0.00              | 0.00          |
| 21-Aug | 15.4             | 7   | 56              | 0.00           | 0.00          | 0.00                | 0.00              | 0.00          |
| 22-Aug | 15.6             | 8   | 56              | 0.00           | 0.00          | 0.00                | 0.00              | 0.00          |
| 23-Aug | 15.2             | 9   | 56              | 0.00           | 0.00          | 0.00                | 0.00              | 0.00          |
| 24-Aug | 14.4             | 10  | 56              | 0.00           | 0.00          | 0.00                | 0.00              | 0.00          |
| 25-Aug | 14.8             | 11  | 56              | 0.00           | 0.00          | 0.00                | 0.00              | 0.00          |
| 26-Aug | 14.5             | 12  | 56              | 0.00           | 0.00          | 0.00                | 0.00              | 0.00          |
| 27-Aug | 14.8             | 13  | 56              | 0.00           | 0.00          | 0.00                | 0.00              | 0.00          |
| 28-Aug | 14.8             | 14  | 56              | 0.00           | 0.00          | 0.00                | 0.00              | 0.00          |
| 29-Aug | 14.3             | 15  | 56              | 0.00           | 0.00          | 0.00                | 0.00              | 0.00          |
| 30-Aug | 14.6             | 16  | 55              | 1.00           | 1.79          | 0.00                | 1.00              | 1.79          |
| 31-Aug | 14.7             | 17  | 54              | 1.00           | 1.82          | 0.00                | 2.00              | 3.57          |
| 1-Sep  | 14.6             | 18  | 54              | 0.00           | 0.00          | 0.00                | 2.00              | 3.57          |
| 2-Sep  | 15.2             | 19  | 54              | 0.00           | 0.00          | 0.00                | 2.00              | 3.57          |
| 3-Sep  | 15.0             | 20  | 53              | 1.00           | 1.85          | 0.00                | 3.00              | 5.36          |
| 4-Sep  | 14.8             | 21  | 53              | 0.00           | 0.00          | 0.00                | 3.00              | 5.36          |
| 5-Sep  | 14.4             | 22  | 52              | 1.00           | 1.89          | 0.00                | 4.00              | 7.14          |
| 6-Sep  | 14.3             | 23  | 52              | 0.00           | 0.00          | 0.00                | 4.00              | 7.14          |
| 7-Sep  | 14.8             | 24  | 52              | 0.00           | 0.00          | 0.00                | 4.00              | 7.14          |
| 8-Sep  | 15.4             | 25  | 52              | 0.00           | 0.00          | 0.00                | 4.00              | 7.14          |
| 9-Sep  | 15.5             | 26  | 52              | 0.00           | 0.00          | 0.00                | 4.00              | 7.14          |
| 10-Sep | 15.1             | 27  | 52              | 0.00           | 0.00          | 0.00                | 4.00              | 7.14          |
| 11-Sep | 15.0             | 28  | 52              | 0.00           | 0.00          | 0.00                | 4.00              | 7.14          |
| 12-Sep | 14.7             | 29  | 52              | 0.00           | 0.00          | 0.00                | 4.00              | 7.14          |
| 13-Sep | 15.1             | 30  | 52              | 0.00           | 0.00          | 0.00                | 4.00              | 7.14          |
| 14-Sep | 15.1             | 31  | 52              | 0.00           | 0.00          | 0.00                | 4.00              | 7.14          |
| 15-Sep | 15.3             | 32  | 52              | 0.00           | 0.00          | 0.00                | 4.00              | 7.14          |
| 16-Sep | 15.1             | 33  | 52              | 0.00           | 0.00          | 0.00                | 4.00              | 7.14          |
| 17-Sep | 15.0             | 34  |                 |                |               |                     |                   |               |
| 18-Sep | 15.0             | 35  |                 |                |               |                     |                   |               |
| 19-Sep | 14.6             | 36  |                 |                |               |                     |                   |               |
| 20-Sep | 14.8             | 37  |                 |                |               |                     |                   |               |
| 21-Sep | 14.6             | 38  |                 |                |               |                     |                   |               |
| 22-Sep | 14.7             | 39  |                 |                |               |                     |                   |               |
| 23-Sep | 14.6             | 40  |                 |                |               |                     |                   |               |
| 24-Sep | 14.8             | 41  |                 |                |               |                     |                   |               |
| 25-Sep | 15.0             | 42  |                 |                |               |                     |                   |               |
| 26-Sep | 14.8             | 43  |                 |                |               |                     |                   |               |

Mort: Mortality.
