# Supplementary material for: Optimization of florfenicol dose against Piscirickettsia salmonis in Salmo salar through PK/PD studies
Source: PubMed Central journal article supplement (PMC6513110; doi:10.1371/journal.pone.0215174), 2019-05-13
Supplement: pone.0215174.s007.pdf [file pone.0215174.s007.pdf]

**S6 Table. Cumulative mortality (%) of control (+) group by date of experiment.**

| Date   | Temperature (°C) | Day | Control (+) |                |               |                     |                   |               |
|--------|------------------|-----|-------------|----------------|---------------|---------------------|-------------------|---------------|
|        |                  |     | Total (N°)  | Mortality /day | Mortality (%) | Withdrawn /analysis | Accumulated Mort. | Mortality (%) |
| 14-Aug | 14.9             | 0   | 60          | 0.00           | 0.00          | 0.00                | 0.00              | 0.00          |
| 15-Aug | 14.7             | 1   | 60          | 0.00           | 0.00          | 0.00                | 0.00              | 0.00          |
| 16-Aug | 15.3             | 2   | 60          | 0.00           | 0.00          | 0.00                | 0.00              | 0.00          |
| 17-Aug | 15.0             | 3   | 60          | 0.00           | 0.00          | 0.00                | 0.00              | 0.00          |
| 18-Aug | 15.5             | 4   | 60          | 0.00           | 0.00          | 0.00                | 0.00              | 0.00          |
| 19-Aug | 14.6             | 5   | 60          | 0.00           | 0.00          | 0.00                | 0.00              | 0.00          |
| 20-Aug | 15.3             | 6   | 58          | 0.00           | 0.00          | 2.00                | 0.00              | 0.00          |
| 21-Aug | 15.4             | 7   | 58          | 0.00           | 0.00          | 0.00                | 0.00              | 0.00          |
| 22-Aug | 15.6             | 8   | 58          | 0.00           | 0.00          | 0.00                | 0.00              | 0.00          |
| 23-Aug | 15.2             | 9   | 58          | 0.00           | 0.00          | 0.00                | 0.00              | 0.00          |
| 24-Aug | 14.4             | 10  | 58          | 0.00           | 0.00          | 0.00                | 0.00              | 0.00          |
| 25-Aug | 14.8             | 11  | 58          | 0.00           | 0.00          | 0.00                | 0.00              | 0.00          |
| 26-Aug | 14.5             | 12  | 58          | 0.00           | 0.00          | 0.00                | 0.00              | 0.00          |
| 27-Aug | 14.8             | 13  | 57          | 1.00           | 1.72          | 0.00                | 1.00              | 1.72          |
| 28-Aug | 14.8             | 14  | 53          | 4.00           | 7.02          | 0.00                | 5.00              | 8.62          |
| 29-Aug | 14.3             | 15  | 52          | 1.00           | 1.89          | 0.00                | 6.00              | 10.34         |
| 30-Aug | 14.6             | 16  | 48          | 4.00           | 7.69          | 0.00                | 10.00             | 17.24         |
| 31-Aug | 14.7             | 17  | 44          | 4.00           | 8.33          | 0.00                | 14.00             | 24.14         |
| 1-Sep  | 14.6             | 18  | 38          | 6.00           | 13.64         | 0.00                | 20.00             | 34.48         |
| 2-Sep  | 15.2             | 19  | 37          | 1.00           | 2.63          | 0.00                | 21.00             | 36.21         |
| 3-Sep  | 15.0             | 20  | 35          | 2.00           | 5.41          | 0.00                | 23.00             | 39.66         |
| 4-Sep  | 14.8             | 21  | 32          | 3.00           | 8.57          | 0.00                | 26.00             | 44.83         |
| 5-Sep  | 14.4             | 22  | 30          | 2.00           | 6.25          | 0.00                | 28.00             | 48.28         |
| 6-Sep  | 14.3             | 23  | 29          | 1.00           | 3.33          | 0.00                | 29.00             | 50.00         |
| 7-Sep  | 14.8             | 24  | 29          | 0.00           | 0.00          | 0.00                | 29.00             | 50.00         |
| 8-Sep  | 15.4             | 25  | 29          | 0.00           | 0.00          | 0.00                | 29.00             | 50.00         |
| 9-Sep  | 15.5             | 26  | 25          | 4.00           | 13.79         | 0.00                | 33.00             | 56.90         |
| 10-Sep | 15.1             | 27  | 25          | 0.00           | 0.00          | 0.00                | 33.00             | 56.90         |
| 11-Sep | 15.0             | 28  | 25          | 0.00           | 0.00          | 0.00                | 33.00             | 56.90         |
| 12-Sep | 14.7             | 29  | 23          | 2.00           | 8.00          | 0.00                | 35.00             | 60.34         |
| 13-Sep | 15.1             | 30  | 23          | 0.00           | 0.00          | 0.00                | 35.00             | 60.34         |
| 14-Sep | 15.1             | 31  | 23          | 0.00           | 0.00          | 0.00                | 35.00             | 60.34         |
| 15-Sep | 15.3             | 32  | 22          | 1.00           | 4.35          | 0.00                | 36.00             | 62.07         |
| 16-Sep | 15.1             | 33  | 22          | 0.00           | 0.00          | 0.00                | 36.00             | 62.07         |
| 17-Sep | 15.0             | 34  | 22          | 0.00           | 0.00          | 0.00                | 36.00             | 62.07         |
| 18-Sep | 15.0             | 35  | 22          | 0.00           | 0.00          | 0.00                | 36.00             | 62.07         |
| 19-Sep | 14.6             | 36  | 21          | 1.00           | 4.55          | 0.00                | 37.00             | 63.79         |
| 20-Sep | 14.8             | 37  | 21          | 0.00           | 0.00          | 0.00                | 37.00             | 63.79         |
| 21-Sep | 14.6             | 38  | 21          | 0.00           | 0.00          | 0.00                | 37.00             | 63.79         |
| 22-Sep | 14.7             | 39  | 21          | 0.00           | 0.00          | 0.00                | 37.00             | 63.79         |
| 23-Sep | 14.6             | 40  | 21          | 0.00           | 0.00          | 0.00                | 37.00             | 63.79         |
| 24-Sep | 14.8             | 41  | 21          | 0.00           | 0.00          | 0.00                | 37.00             | 63.79         |
| 25-Sep | 15.0             | 42  | 21          | 0.00           | 0.00          | 0.00                | 37.00             | 63.79         |
| 26-Sep | 14.8             | 43  | 21          | 0.00           | 0.00          | 0.00                | 37.00             | 63.79         |

Mort: Mortality.
